# Supplementary material
Source: publisher site journal article supplement (https://www.spandidos-publications.com/1805/downloadSupplementary)
Supplement: Supplementary file 1 [file downloadSupplementary]

## Sheet: Sheet1
Table SI. Differentially expressed genes identified by the integrated analysis of seven Gene Expression Omnibus datasets (|log2FC| ≥1 and adjP-value <0.05). FC, fold-change; adj, adjusted.
A, Upregulated genes
Gene	P-value	adj P-value	logFC
SLC6A14	1.33769e-20	3.65846e-16	3.74675
CTSE	2.15402e-18	5.89103e-14	3.45839
TFF1	8.16463e-18	2.23295e-13	3.02477
CEACAM6	2.23608e-17	6.11546e-13	3.45103
LAMC2	3.68034e-17	1.00654e-12	2.95186
GABRP	4.59628e-17	1.25704e-12	2.92368
CST1	6.11657e-17	1.67282e-12	2.88057
S100P	1.61404e-16	4.41425e-12	4.13393
SLPI	3.08391e-16	8.43419e-12	2.50897
COL11A1	1.50351e-15	4.11196e-11	3.04615
CLDN18	2.50986e-15	6.86423e-11	2.74569
COL10A1	2.89851e-15	7.92713e-11	3.03414
DKK1	4.04583e-15	1.10649e-10	2.5474
NQO1	5.07707e-15	1.38853e-10	2.28043
CEACAM5	5.45302e-15	1.49135e-10	3.31616
LCN2	5.88324e-15	1.60901e-10	2.65161
TMPRSS4	7.28902e-15	1.99347e-10	3.22958
IFI27	9.30647e-15	2.54523e-10	2.10459
TSPAN1	1.2572e-14	3.43832e-10	2.86332
AHNAK2	2.43468e-14	6.65861e-10	2.56887
GPRC5A	2.8882e-14	7.89894e-10	2.20091
NMU	3.52915e-14	9.65186e-10	2.3589
ANLN	3.52915e-14	9.65186e-10	2.14375
SDR16C5	4.28834e-14	1.17282e-09	2.64076
PLAC8	5.18343e-14	1.41762e-09	2.15241
SERPINB3	6.56588e-14	1.7957e-09	1.80727
TCN1	7.55401e-14	2.06595e-09	2.41206
SERPINB5	8.0544e-14	2.2028e-09	2.54506
GJB2	9.11457e-14	2.49274e-09	2.8181
SFN	1.0551e-13	2.88559e-09	2.23112
LAMB3	1.68283e-13	4.60237e-09	2.6973
ITGA2	1.88227e-13	5.14782e-09	2.46204
INHBA	2.0114e-13	5.50097e-09	2.33445
DPCR1	2.33035e-13	6.37329e-09	2.79755
MMP11	2.42928e-13	6.64383e-09	2.04849
CXCL5	3.08265e-13	8.43075e-09	2.51855
CDH3	3.14707e-13	8.60691e-09	2.18365
MALL	4.0955e-13	1.12008e-08	1.86753
ANO1	4.7932e-13	1.31089e-08	1.75553
MSLN	4.7932e-13	1.31089e-08	2.61496
LEMD1	6.02988e-13	1.64911e-08	2.24319
MMP1	6.16866e-13	1.68707e-08	2.49647
VSIG1	6.6206e-13	1.81067e-08	2.13782
PI3	6.99831e-13	1.91397e-08	2.02232
CCL20	7.26025e-13	1.98561e-08	2.22561
FAM83D	9.34059e-13	2.55456e-08	1.75099
MBOAT2	1.2325e-12	3.37078e-08	1.85778
ANXA10	1.43726e-12	3.93076e-08	2.52625
CENPK	1.55731e-12	4.25909e-08	1.65517
GCNT3	1.95472e-12	5.34596e-08	2.21916
OAS1	2.46938e-12	6.7535e-08	1.61524
LRRN1	2.50762e-12	6.85809e-08	1.47083
IGFL2	2.7137e-12	7.42169e-08	2.01484
KRT6B	2.78981e-12	7.62985e-08	1.44343
MMP12	2.9932e-12	8.1861e-08	2.296
TRIM29	3.23198e-12	8.83913e-08	2.27524
MGLL	4.20803e-12	1.15085e-07	1.4165
GPR87	4.20803e-12	1.15085e-07	2.06207
KRT19	4.23147e-12	1.15727e-07	2.41644
KRT6A	5.64154e-12	1.5429e-07	1.77567
KRT23	5.95739e-12	1.62929e-07	2.12043
DLGAP5	9.55172e-12	2.6123e-07	1.63333
ID1	9.92108e-12	2.71331e-07	1.42736
FOXQ1	9.97689e-12	2.72858e-07	1.86283
OLR1	1.05639e-11	2.88912e-07	1.80047
RSAD2	1.06967e-11	2.92543e-07	1.52013
POSTN	1.11034e-11	3.03666e-07	2.53736
KCNN4	1.25572e-11	3.43426e-07	1.99605
MIA	1.67661e-11	4.58536e-07	2.25493
TFF2	1.95769e-11	5.35409e-07	2.46385
DUOX2	2.27697e-11	6.22728e-07	2.0381
ARNTL2	2.33013e-11	6.37268e-07	1.75321
SFTA2	2.4362e-11	6.66277e-07	2.19413
HN1	4.37297e-11	1.19596e-06	1.43866
SULF1	4.76322e-11	1.30269e-06	2.52992
KCNK1	5.67372e-11	1.55171e-06	1.38237
CTHRC1	5.83696e-11	1.59635e-06	2.05212
TMC5	5.95857e-11	1.62961e-06	2.08504
COL17A1	5.96218e-11	1.6306e-06	2.28264
PCDH7	6.69269e-11	1.83038e-06	1.31778
MLPH	7.78793e-11	2.12992e-06	2.01141
RHBDL2	7.80279e-11	2.13399e-06	1.5965
DHRS9	8.124e-11	2.22183e-06	1.69643
ACSL5	8.95783e-11	2.44988e-06	1.50366
SYTL2	9.46475e-11	2.58852e-06	1.33447
IFI6	9.90578e-11	2.70913e-06	1.50936
IGF2BP3	9.99606e-11	2.73382e-06	1.54351
SLC44A4	1.13267e-10	3.09773e-06	1.56005
LY6E	1.1956e-10	3.26983e-06	1.47732
CORO2A	1.22766e-10	3.35752e-06	1.609
S100A16	1.33992e-10	3.66455e-06	1.5147
SULF2	1.38723e-10	3.79393e-06	1.45206
NT5E	1.39927e-10	3.82688e-06	1.31397
MTMR11	1.41141e-10	3.86007e-06	1.61537
AGR2	1.551e-10	4.24182e-06	2.29543
COMP	1.7166e-10	4.69474e-06	2.12841
MYOF	1.7603e-10	4.81424e-06	1.54709
MUC16	1.95317e-10	5.34173e-06	1.64252
FAP	2.02197e-10	5.52989e-06	2.02526
C19orf33	2.18219e-10	5.96806e-06	2.53214
GBP3	2.19839e-10	6.01237e-06	1.16513
CAPG	2.2406e-10	6.12781e-06	1.65985
PLAU	2.4736e-10	6.76504e-06	1.63372
KIF11	2.49969e-10	6.83641e-06	1.22475
MXRA5	2.73721e-10	7.48599e-06	1.44211
FN1	2.90968e-10	7.95769e-06	2.16575
EFNB2	2.96956e-10	8.12145e-06	1.38754
ASAP2	2.97135e-10	8.12634e-06	1.17869
TNFAIP6	3.01795e-10	8.25378e-06	1.61039
S100A2	3.1608e-10	8.64448e-06	2.07473
S100A6	3.32226e-10	9.08605e-06	1.56939
CD55	3.36052e-10	9.19069e-06	1.38777
PMEPA1	3.41211e-10	9.33177e-06	1.12275
HK2	3.43815e-10	9.40301e-06	1.64076
SCEL	3.6517e-10	9.98704e-06	1.84854
MPZL2	3.76426e-10	1.02949e-05	1.14431
FXYD5	3.79259e-10	1.03724e-05	1.27659
OSBPL3	3.8861e-10	1.06281e-05	1.46524
XAF1	4.08613e-10	1.11751e-05	1.23354
MX1	4.39892e-10	1.20306e-05	1.2677
SPRR1B	4.39892e-10	1.20306e-05	1.61513
NPR3	4.4313e-10	1.21192e-05	1.36511
CXCL10	4.52744e-10	1.23821e-05	1.97338
KLK7	5.25459e-10	1.43708e-05	2.13866
MMP7	5.30843e-10	1.4518e-05	1.8806
FNDC1	5.33236e-10	1.45835e-05	1.66631
KIF20A	5.70104e-10	1.55918e-05	1.21546
S100A14	5.73574e-10	1.56867e-05	1.76126
SLC2A1	5.89662e-10	1.61267e-05	1.83995
NUSAP1	6.2899e-10	1.72023e-05	1.25175
GPX2	6.31687e-10	1.7276e-05	1.81358
SHCBP1	6.8354e-10	1.86941e-05	1.10488
ENO2	7.40465e-10	2.0251e-05	1.2871
TRIM31	7.42095e-10	2.02956e-05	1.7115
STYK1	7.47163e-10	2.04342e-05	1.69439
S100A11	7.52261e-10	2.05736e-05	1.43226
ASPM	8.04353e-10	2.19983e-05	1.48958
EPHX4	8.15797e-10	2.23112e-05	1.11129
ITGA3	8.26642e-10	2.26078e-05	1.61192
EGLN3	8.54941e-10	2.33818e-05	1.73759
BCAS1	8.79214e-10	2.40456e-05	1.70083
LAMA3	9.66891e-10	2.64435e-05	1.58024
COL1A2	9.84423e-10	2.6923e-05	1.82813
SAMD9	1.01078e-09	2.76439e-05	1.28921
IL1R2	1.19687e-09	3.27331e-05	1.3687
SGIP1	1.2699e-09	3.47304e-05	1.15273
NUF2	1.2699e-09	3.47304e-05	1.22217
TNFRSF21	1.29412e-09	3.53928e-05	1.17771
AKR1B10	1.36917e-09	3.74455e-05	1.44608
VCAN	1.49154e-09	4.07921e-05	1.98971
NHS	1.51183e-09	4.13471e-05	1.06566
IFI44L	1.52116e-09	4.16021e-05	1.51437
LIPH	1.52116e-09	4.16021e-05	1.63555
IFI44	1.60732e-09	4.39585e-05	1.25576
JUP	1.63695e-09	4.47689e-05	1.2544
CRIP1	1.64693e-09	4.50419e-05	1.54792
TOP2A	1.65112e-09	4.51566e-05	1.64918
ST6GALNAC1	1.66705e-09	4.55921e-05	1.73338
CCNB1	1.67545e-09	4.5822e-05	1.45439
EPHA4	1.67719e-09	4.58694e-05	1.19302
COL5A2	1.77953e-09	4.86683e-05	1.63637
SLC16A4	1.80303e-09	4.93112e-05	1.44758
UBE2T	1.84674e-09	5.05065e-05	1.47441
KYNU	1.88012e-09	5.14193e-05	1.30542
CEP55	1.95722e-09	5.35279e-05	1.57394
IGFBP3	2.01883e-09	5.52131e-05	1.98449
NDNF	2.02755e-09	5.54513e-05	1.0912
COL12A1	2.05485e-09	5.61982e-05	1.58124
SERPINB2	2.07559e-09	5.67653e-05	1.53725
CP	2.11465e-09	5.78336e-05	1.64702
THBS2	2.12814e-09	5.82024e-05	2.01723
TNFSF4	2.25128e-09	6.15702e-05	1.13004
COL5A1	2.27736e-09	6.22835e-05	1.70834
CCL18	2.33027e-09	6.37306e-05	1.68795
COL1A1	2.59043e-09	7.08455e-05	1.64275
MATN3	2.66972e-09	7.30141e-05	1.78805
PSCA	2.93298e-09	8.02141e-05	2.22934
TMEM45B	3.08391e-09	8.43419e-05	1.72659
NDC80	3.11679e-09	8.5241e-05	1.20071
SDC1	3.15097e-09	8.61758e-05	1.50204
DSG3	3.18546e-09	8.71191e-05	1.24901
AFAP1-AS1	3.19157e-09	8.72863e-05	1.56177
CAPN8	3.43508e-09	9.39461e-05	2.1811
PLEK2	3.51935e-09	9.62508e-05	1.59325
COL3A1	3.54802e-09	9.70347e-05	1.59898
TPX2	3.61642e-09	9.89053e-05	1.38705
ESM1	3.85877e-09	0.000105534	1.25217
KRT7	3.94428e-09	0.000107872	1.70685
GBP2	4.45548e-09	0.000121853	1.1183
WNT2	4.57424e-09	0.000125101	1.20124
MST1R	4.88519e-09	0.000133605	1.58055
INPP4B	5.07683e-09	0.000138846	1.22103
PPARG	5.15034e-09	0.000140857	1.37605
NEK2	5.15615e-09	0.000141016	1.22962
MET	5.42829e-09	0.000148458	1.2078
NOX4	5.46447e-09	0.000149448	1.59981
FAM83B	5.71264e-09	0.000156235	1.03176
UBE2C	5.85979e-09	0.000160259	1.41961
XDH	5.96631e-09	0.000163173	1.36756
PLAT	6.03455e-09	0.000165039	1.51755
EPSTI1	6.07064e-09	0.000166026	1.34041
IL20RB	6.10132e-09	0.000166865	1.19706
FHL2	6.94709e-09	0.000189996	1.45813
C15orf48	6.97483e-09	0.000190755	1.7249
GREM1	7.38332e-09	0.000201926	1.55828
ADAM9	7.52418e-09	0.000205779	1.21145
GALNT5	7.53862e-09	0.000206174	1.837
SPRR3	7.73926e-09	0.000211661	1.44375
LYZ	7.73936e-09	0.000211664	1.20312
ARL14	8.60785e-09	0.000235416	1.55426
MMP9	8.81184e-09	0.000240995	1.266
APOL1	9.02943e-09	0.000246946	1.39015
SLCO1B3	9.05706e-09	0.000247701	1.24166
ZG16B	9.15931e-09	0.000250498	2.19282
EPHA2	9.60385e-09	0.000262656	1.17615
CD109	9.74076e-09	0.0002664	1.17735
CENPF	1.00955e-08	0.000276102	1.33453
PLAUR	1.10348e-08	0.000301791	1.34442
AMIGO2	1.18377e-08	0.000323748	1.12669
SQLE	1.28531e-08	0.000351519	1.10442
VSIG2	1.37059e-08	0.000374843	1.54514
CRABP2	1.38143e-08	0.000377807	1.05936
TMPRSS3	1.3823e-08	0.000378046	1.41593
HIST1H2BD	1.4127e-08	0.00038636	1.32925
TMEM154	1.44212e-08	0.000394406	1.14105
SGPP2	1.49687e-08	0.000409378	1.40062
ECT2	1.51689e-08	0.000414853	1.42875
BGN	1.7151e-08	0.000469062	1.15592
IGFBP5	1.74577e-08	0.00047745	1.23896
MUC1	1.8065e-08	0.000494061	1.24624
DTL	1.89344e-08	0.000517837	1.05803
F5	1.90876e-08	0.000522028	1.24074
EFNA5	1.91863e-08	0.000524726	1.14667
HTR2B	1.97684e-08	0.000540645	1.04815
TMSB10	2.09781e-08	0.000573729	1.14104
PTPRR	2.14388e-08	0.000586329	1.3981
CST2	2.2201e-08	0.000607174	1.15239
C1GALT1	2.23759e-08	0.000611957	1.07652
FXYD3	2.23759e-08	0.000611957	1.83856
AGR3	2.27291e-08	0.000621618	1.33827
MELK	2.29074e-08	0.000626496	1.37529
CDH11	2.29214e-08	0.000626877	1.54817
EPYC	2.44848e-08	0.000669634	1.36557
S100A10	2.44851e-08	0.000669643	1.07092
BUB1B	2.49474e-08	0.000682286	1.20315
RARRES3	2.49955e-08	0.000683601	1.0431
MUC4	2.66905e-08	0.000729959	1.40125
FGD6	2.71293e-08	0.00074196	1.16875
EDNRA	2.73429e-08	0.000747801	1.60767
C5orf46	2.75743e-08	0.00075413	1.28975
HS3ST1	2.80256e-08	0.000766471	1.19223
AP1S3	2.85985e-08	0.00078214	1.0068
LEF1	2.98944e-08	0.000817581	1.15068
MUC13	3.01353e-08	0.000824171	1.57126
STIL	3.03765e-08	0.000830767	1.01088
ASPHD2	3.17424e-08	0.000868123	1.24464
SULT1C2	3.21069e-08	0.000878093	1.3744
SLC26A9	3.26082e-08	0.000891801	1.66854
MMP10	3.38207e-08	0.000924964	1.05082
CENPW	3.40886e-08	0.000932288	1.04669
MMP28	3.40886e-08	0.000932288	1.17328
ECM1	3.46835e-08	0.00094856	1.33619
OCIAD2	3.55942e-08	0.000973467	1.14322
TTK	3.57065e-08	0.000976538	1.08934
KIF14	3.67545e-08	0.0010052	1.00083
VILL	3.79726e-08	0.00103851	1.52561
BHLHE40	3.86275e-08	0.00105642	1.01618
TRIM59	3.865e-08	0.00105704	1.14295
DDX60	3.92063e-08	0.00107225	1.13153
OAS2	3.96866e-08	0.00108539	1.16399
CLRN3	4.09152e-08	0.00111899	1.21452
CYP4F3	4.17197e-08	0.00114099	1.15934
FAM3D	4.17926e-08	0.00114298	1.28679
LGALS3BP	4.20885e-08	0.00115108	1.03951
OASL	4.38414e-08	0.00119902	1.48832
WFDC2	4.54604e-08	0.0012433	1.3472
CAMK2N1	4.77208e-08	0.00130512	1.13282
MAL2	5.22646e-08	0.00142939	1.38387
C1orf116	5.52814e-08	0.00151189	1.07813
MYEOV	5.56894e-08	0.00152305	1.21862
GPX8	5.65131e-08	0.00154558	1.15921
MX2	5.73353e-08	0.00156806	1.0685
TMEM133	5.75574e-08	0.00157414	1.02885
PXDN	7.03087e-08	0.00192287	1.17913
TSPAN8	7.0697e-08	0.00193349	1.46217
PPL	7.29733e-08	0.00199575	1.00883
FBXO32	7.30818e-08	0.00199871	1.35907
MYO1E	7.49806e-08	0.00205064	1.03626
TGM2	7.54616e-08	0.0020638	1.08913
RHPN2	7.79055e-08	0.00213064	1.12412
ANTXR1	7.80185e-08	0.00213373	1.14748
B3GNT3	7.84021e-08	0.00214422	1.17533
S100A4	8.19525e-08	0.00224132	1.26369
IL1RAP	8.27831e-08	0.00226403	1.02943
LGALS4	8.72557e-08	0.00238636	1.54055
KLF5	8.78013e-08	0.00240128	1.58033
ANXA3	9.17009e-08	0.00250793	1.306
RRM2	9.33829e-08	0.00255393	1.28494
HEPH	9.34157e-08	0.00255483	1.26427
CYP2C18	9.59976e-08	0.00262544	1.4115
AEBP1	1.03378e-07	0.0028273	1.29206
KRT16	1.04651e-07	0.00286211	1.24814
PPAPDC1A	1.05937e-07	0.00289727	1.53872
FAM83A	1.06182e-07	0.00290397	1.22606
DPYSL3	1.07235e-07	0.00293277	1.22829
RTP4	1.08342e-07	0.00296304	1.24868
ADAM28	1.11412e-07	0.003047	1.12869
CDK1	1.12752e-07	0.00308366	1.15289
TRIM16	1.14106e-07	0.00312069	1.03076
SERPINH1	1.20074e-07	0.00328392	1.15282
HOXB6	1.22065e-07	0.00333836	1.04069
SPOCK1	1.23239e-07	0.00337047	1.19336
FOXF2	1.31591e-07	0.0035989	1.04809
WNT5A	1.35489e-07	0.00370548	1.1096
CEACAM1	1.35928e-07	0.00371749	1.30228
CKS2	1.36882e-07	0.00374359	1.22949
SEMA3C	1.42402e-07	0.00389455	1.21863
TGFBI	1.44045e-07	0.00393948	1.14476
SRPX2	1.52489e-07	0.00417042	1.24608
SHISA2	1.54363e-07	0.00422167	1.54736
TFF3	1.60587e-07	0.00439189	1.26515
LGALS1	1.65127e-07	0.00451606	1.13761
MDK	1.67742e-07	0.00458758	1.12869
KLK6	1.6868e-07	0.00461323	1.59085
PLS1	1.71741e-07	0.00469695	1.24669
SPINK5	1.71741e-07	0.00469695	1.18052
CDKN2B	1.74163e-07	0.0047632	1.00192
MUC17	1.7854e-07	0.00488289	1.16178
HOXB7	1.79117e-07	0.00489867	1.32647
BPIFB1	1.80216e-07	0.00492871	1.34695
ANKRD22	1.81522e-07	0.00496443	1.40714
BIK	1.84197e-07	0.00503762	1.48058
HOXB2	1.85334e-07	0.00506871	1.14191
OLFML2B	2.00833e-07	0.00549258	1.3591
ADAMTS12	2.06364e-07	0.00564386	1.12939
TIMP1	2.06898e-07	0.00565846	1.20723
IL1RN	2.23289e-07	0.00610674	1.21216
GJB3	2.23955e-07	0.00612495	1.12535
TREM1	2.26667e-07	0.00619912	1.1972
NCF2	2.32814e-07	0.00636722	1.10934
RAB31	2.45172e-07	0.0067052	1.34337
PBK	2.46549e-07	0.00674287	1.02319
COL8A1	2.49349e-07	0.00681944	1.37893
AREG	2.55723e-07	0.00699377	1.06448
CDCA7	2.80535e-07	0.00767234	1.0495
CYP2S1	2.93811e-07	0.00803545	1.21482
KLK10	2.99942e-07	0.00820312	2.00493
LY75	3.05915e-07	0.00836647	1.27163
WISP1	3.57063e-07	0.00976532	1.1312
FGFBP1	3.82361e-07	0.0104572	1.19911
TMEM200A	3.86094e-07	0.0105593	1.20277
CST6	4.40745e-07	0.0120539	1.53256
TBC1D2	5.22602e-07	0.0142926	1.06573
BMP4	5.47167e-07	0.0149645	1.32166
HMMR	5.55439e-07	0.0151907	1.01363
MMP3	5.55439e-07	0.0151907	1.01569
HOPX	5.688e-07	0.0155561	1.12802
CLIC3	5.73107e-07	0.0156739	1.73017
CDC20	5.85503e-07	0.0160129	1.05847
HIST2H2BE	6.02624e-07	0.0164812	1.23317
PFKP	6.02624e-07	0.0164812	1.14299
FERMT1	6.32317e-07	0.0172932	1.37919
EPS8L1	6.40834e-07	0.0175262	1.24895
PRC1	7.73131e-07	0.0211444	1.10549
ZBED2	7.88874e-07	0.0215749	1.30921
TPRG1	8.13877e-07	0.0222587	1.16093
EPS8L3	8.28763e-07	0.0226658	1.59653
ODAM	8.65313e-07	0.0236655	1.26262
GRP	9.02509e-07	0.0246827	1.05169
SLC24A3	9.04739e-07	0.0247437	1.00838
CEMIP	9.10037e-07	0.0248886	1.16235
PMAIP1	9.20481e-07	0.0251742	1.19836
HOXA13	1.03036e-06	0.0281793	1.01859
ABHD17C	1.03875e-06	0.0284087	1.2539
FUT3	1.08666e-06	0.029719	1.06518
CTSK	1.09578e-06	0.0299686	1.22174
PDZK1IP1	1.11242e-06	0.0304236	1.10219
SPARC	1.11253e-06	0.0304265	1.20504
BAIAP2L1	1.15944e-06	0.0317094	1.13215
MACC1	1.16683e-06	0.0319116	1.1162
NR1I2	1.31198e-06	0.0358815	1.0986
SFRP4	1.32018e-06	0.0361055	1.21709
LOXL1	1.36286e-06	0.037273	1.07682
TNFSF11	1.3788e-06	0.0377088	1.02824
OLFM4	1.44122e-06	0.0394159	1.25829
LAMP5	1.7906e-06	0.048971	1.01027
EDIL3	1.80294e-06	0.0493085	1.06746
B, Downregulated genes
Gene	P-value	adj P-value	logFC
ERP27	4.1484e-19	1.13455e-14	-2.97691
CPA2	5.48907e-19	1.50121e-14	-3.01571
SERPINI2	6.13529e-18	1.67794e-13	-3.21267
TMED6	1.03823e-16	2.83947e-12	-2.82716
EGF	1.807e-16	4.94196e-12	-2.50875
CEL	2.06698e-16	5.65299e-12	-2.85435
PNLIPRP1	2.75715e-16	7.54052e-12	-3.17243
FAM150B	2.91661e-16	7.97663e-12	-2.3908
CELA2B	4.11532e-16	1.1255e-11	-2.59485
CTRL	5.5551e-16	1.51927e-11	-2.9387
ALB	5.67002e-16	1.55069e-11	-2.86844
AQP8	1.37524e-15	3.76116e-11	-2.75752
AOX1	2.03655e-15	5.56977e-11	-2.16399
PNLIPRP2	2.05719e-15	5.6262e-11	-2.97363
CLPS	2.31131e-15	6.32121e-11	-2.67956
PAIP2B	6.55768e-15	1.79346e-10	-2.27162
CTRC	9.65855e-15	2.64152e-10	-2.75874
CELP	1.49668e-14	4.09328e-10	-2.45892
BTG2	2.28034e-14	6.2365e-10	-1.58202
GP2	2.80535e-14	7.67234e-10	-2.73783
SYCN	5.80329e-14	1.58714e-09	-2.77673
IAPP	6.63064e-14	1.81341e-09	-2.36523
PLA2G1B	6.63064e-14	1.81341e-09	-2.56708
CUZD1	7.07979e-14	1.93625e-09	-2.67909
BNIP3	8.67464e-14	2.37243e-09	-1.56768
CELA3A	9.36803e-14	2.56206e-09	-2.44324
ACADL	9.72424e-14	2.65948e-09	-1.86223
GUCA1C	1.47683e-13	4.03897e-09	-1.91932
SLC39A5	2.0673e-13	5.65386e-09	-1.88553
KLK1	2.33035e-13	6.37329e-09	-2.3576
C5	2.42928e-13	6.64383e-09	-1.80162
LIFR	2.77727e-13	7.59555e-09	-1.4082
PDK4	3.14942e-13	8.61334e-09	-2.0422
CPA1	3.48336e-13	9.52664e-09	-2.50793
REG1B	4.44941e-13	1.21687e-08	-2.32891
NR5A2	4.88718e-13	1.33659e-08	-2.0218
PM20D1	5.89371e-13	1.61187e-08	-2.02137
RBPJL	6.6472e-13	1.81794e-08	-2.37139
KLB	6.99831e-13	1.91397e-08	-1.52558
ECHDC3	7.39434e-13	2.02228e-08	-1.48441
ZBTB16	8.54565e-13	2.33715e-08	-1.62643
FGL1	9.81411e-13	2.68406e-08	-2.21499
DPP10	1.38149e-12	3.77825e-08	-1.68259
GNMT	1.41011e-12	3.85651e-08	-2.36209
PAK3	1.50685e-12	4.12107e-08	-1.68111
CTRB2	1.58019e-12	4.32165e-08	-2.13934
PNLIP	1.76799e-12	4.83529e-08	-2.21315
SLC1A2	1.95472e-12	5.34596e-08	-1.44139
FAM46C	1.98417e-12	5.4265e-08	-1.51942
BEX1	2.11363e-12	5.78055e-08	-1.80263
ANPEP	2.18499e-12	5.97572e-08	-2.049
SFRP5	2.35764e-12	6.4479e-08	-1.54072
LGALS2	2.43742e-12	6.6661e-08	-2.03911
GRB14	2.54637e-12	6.96406e-08	-1.54444
DPT	3.28819e-12	8.99286e-08	-1.69337
MT1M	3.70372e-12	1.01293e-07	-1.7797
MCOLN3	3.83021e-12	1.04752e-07	-1.43609
AKAP7	3.91707e-12	1.07128e-07	-1.44852
P2RX1	4.094e-12	1.11967e-07	-1.86393
PSAT1	4.37276e-12	1.19591e-07	-1.70329
KIAA1324	4.82043e-12	1.31834e-07	-1.93911
CPB1	5.76069e-12	1.57549e-07	-1.99864
GPHA2	6.01529e-12	1.64512e-07	-1.82531
NRCAM	6.39871e-12	1.74998e-07	-1.5641
TDH	6.81409e-12	1.86359e-07	-1.33331
SLC4A4	7.22684e-12	1.97647e-07	-1.66931
TRHDE	7.4435e-12	2.03572e-07	-2.03309
SERPINI1	8.29638e-12	2.26898e-07	-1.49042
HOMER2	9.07762e-12	2.48264e-07	-1.62868
DPEP1	1.05601e-11	2.88808e-07	-1.87838
SLC30A2	1.50858e-11	4.12582e-07	-1.39644
MYRIP	1.85707e-11	5.07891e-07	-1.30606
GSTA1	1.85994e-11	5.08676e-07	-1.49746
NPY1R	1.92228e-11	5.25724e-07	-1.30312
CBS	2.27697e-11	6.22728e-07	-1.69109
CCDC69	2.4362e-11	6.66277e-07	-1.36035
KCNJ16	2.49077e-11	6.81201e-07	-1.78742
SLC16A10	2.57512e-11	7.04268e-07	-1.66387
CCDC110	3.06366e-11	8.37881e-07	-1.8628
FKBP11	3.26655e-11	8.93368e-07	-1.25291
REG1A	3.37224e-11	9.22273e-07	-1.59958
REG3G	3.76531e-11	1.02978e-06	-1.79474
CA4	4.60102e-11	1.25833e-06	-1.47787
GAMT	4.88807e-11	1.33684e-06	-1.46731
BRSK2	5.24372e-11	1.4341e-06	-1.15896
PDIA2	5.33582e-11	1.45929e-06	-2.37771
C6	5.96207e-11	1.63057e-06	-1.83844
PRSS3	7.39112e-11	2.0214e-06	-1.77937
LRMP	7.50301e-11	2.052e-06	-1.06559
SYBU	9.52118e-11	2.60395e-06	-1.54191
SLC43A1	9.54904e-11	2.61157e-06	-1.67901
PPP1R1A	1.18507e-10	3.24104e-06	-1.09539
SLC3A1	1.19884e-10	3.2787e-06	-1.43071
A1CF	1.2216e-10	3.34094e-06	-1.05551
RGN	1.41141e-10	3.86007e-06	-1.63875
PTGER4	1.48615e-10	4.06447e-06	-1.12517
SEMA6D	1.49664e-10	4.09315e-06	-1.06078
SEL1L	1.53784e-10	4.20583e-06	-1.44563
PHGDH	1.73106e-10	4.73429e-06	-1.2176
SCGN	1.73106e-10	4.73429e-06	-1.55864
TEX11	1.83701e-10	5.02405e-06	-2.13648
ZG16	1.86597e-10	5.10325e-06	-1.19256
MT1G	1.91889e-10	5.24798e-06	-1.60141
PDCD4	2.35708e-10	6.44638e-06	-1.2277
BACE1	2.4736e-10	6.76504e-06	-1.57414
EPHX2	2.5202e-10	6.89249e-06	-1.51097
GC	2.53973e-10	6.94591e-06	-1.32062
MT1F	3.01795e-10	8.25378e-06	-1.36
EPB41L4B	3.37538e-10	9.23132e-06	-1.31537
FAM129A	3.82635e-10	1.04647e-05	-1.40225
ART3	3.96646e-10	1.08479e-05	-1.06577
MT1H	4.45959e-10	1.21965e-05	-1.44173
KLHL13	4.49667e-10	1.2298e-05	-1.05786
NR0B2	4.59628e-10	1.25704e-05	-1.1796
CELA3B	5.49902e-10	1.50393e-05	-1.66038
ABAT	5.69505e-10	1.55754e-05	-1.40301
CTH	5.78215e-10	1.58136e-05	-1.24338
FAM107A	5.86425e-10	1.60381e-05	-1.14411
CFTR	6.31687e-10	1.7276e-05	-1.44181
ANGPTL1	6.46743e-10	1.76878e-05	-1.25669
KCNK3	6.69536e-10	1.83111e-05	-1.31941
ADH1B	7.3024e-10	1.99713e-05	-1.61647
CXCL12	7.42095e-10	2.02956e-05	-1.43538
KCNJ8	8.37972e-10	2.29177e-05	-1.00448
TSPAN7	8.83878e-10	2.41732e-05	-1.41618
SLC41A1	1.03773e-09	2.83809e-05	-1.20331
BEX5	1.0415e-09	2.84839e-05	-1.19951
LMO3	1.09452e-09	2.9934e-05	-1.42598
EPHX1	1.27262e-09	3.48049e-05	-1.3573
TMEM97	1.35003e-09	3.6922e-05	-1.42249
FLT3	1.42125e-09	3.88699e-05	-1.18798
SLC17A4	1.47316e-09	4.02895e-05	-1.42444
COCH	1.49333e-09	4.08411e-05	-1.48353
ARSE	1.5573e-09	4.25906e-05	-1.22948
TPST2	1.65696e-09	4.53163e-05	-1.55897
GATM	1.69819e-09	4.64438e-05	-1.49986
FABP4	1.77084e-09	4.84306e-05	-1.50951
REG3A	2.17198e-09	5.94014e-05	-1.53946
KLF15	2.20449e-09	6.02907e-05	-1.30342
MAT1A	2.27736e-09	6.22835e-05	-1.21487
NUCB2	2.29036e-09	6.26389e-05	-1.33621
SLC25A15	2.30369e-09	6.30036e-05	-1.04106
ERO1LB	2.41383e-09	6.6016e-05	-1.74794
RNF186	2.48889e-09	6.80687e-05	-1.5421
HPN	2.63994e-09	7.21998e-05	-1.36058
PROX1	2.81652e-09	7.70289e-05	-1.35629
PRKAR2B	3.06682e-09	8.38744e-05	-1.24085
IL22RA1	3.15097e-09	8.61758e-05	-1.25651
LYVE1	3.35027e-09	9.16264e-05	-1.27029
CHGA	3.43582e-09	9.39662e-05	-1.04156
SLC7A2	3.60551e-09	9.8607e-05	-1.44235
F8	3.69322e-09	0.000101006	-1.30683
GMNN	3.70234e-09	0.000101255	-1.14035
NRG4	3.98798e-09	0.000109067	-1.57385
UGT2A3	4.11277e-09	0.00011248	-1.12548
CTNND2	4.15582e-09	0.000113657	-1.46644
PRSS3P2	4.45804e-09	0.000121923	-1.0982
TMEM52	4.6225e-09	0.000126421	-1.71185
CRAT	4.6546e-09	0.000127299	-1.06953
KIAA0922	4.94695e-09	0.000135294	-1.15001
PHYHIPL	5.04783e-09	0.000138053	-1.07733
MTUS2	5.10315e-09	0.000139566	-1.00168
MT1X	5.15034e-09	0.000140857	-1.10347
CCKBR	5.34538e-09	0.000146191	-1.3066
ABCA5	5.42829e-09	0.000148458	-1.06927
RAB26	5.58664e-09	0.000152789	-1.36897
GAS2	5.71099e-09	0.00015619	-1.33485
CBFA2T3	5.94923e-09	0.000162705	-1.0065
TCEA3	6.23068e-09	0.000170403	-1.10168
KCNJ5	6.2743e-09	0.000171596	-1.01107
BEX2	6.57775e-09	0.000179895	-1.05575
SEC11C	7.33406e-09	0.000200579	-1.07381
AZGP1	7.69651e-09	0.000210492	-1.36657
PBLD	7.69651e-09	0.000210492	-1.09584
LINC00339	8.03397e-09	0.000219721	-1.14314
GPT2	8.70029e-09	0.000237944	-1.30817
DNASE1	8.73134e-09	0.000238793	-1.13359
BCAT1	8.97469e-09	0.000245449	-1.01165
PEBP4	1.14304e-08	0.000312609	-1.02761
ACSM3	1.28254e-08	0.000350763	-1.09818
CHRM3	1.37059e-08	0.000374843	-1.31849
GDF10	1.464e-08	0.000400389	-1.16374
NPHS1	1.5645e-08	0.000427875	-1.04476
CYB5A	1.74577e-08	0.00047745	-1.09444
ADAMTSL3	1.77451e-08	0.00048531	-1.06072
CD36	1.87822e-08	0.000513675	-1.25743
IMPA2	1.96943e-08	0.000538619	-1.30975
FAM3B	2.15156e-08	0.00058843	-1.22986
F11	2.1802e-08	0.000596264	-1.69731
GSTA2	2.26899e-08	0.000620546	-1.42781
SST	2.47559e-08	0.000677049	-1.33266
IGFBP2	2.78668e-08	0.000762129	-1.16248
MKNK1	2.8768e-08	0.000786775	-1.04481
C2CD4B	2.8947e-08	0.000791673	-1.27462
MUC15	3.06401e-08	0.000837975	-1.10441
CELA2A	3.2814e-08	0.000897429	-1.50477
KIRREL2	4.00531e-08	0.00109541	-1.10653
STXBP6	4.00531e-08	0.00109541	-1.04407
SIDT2	4.46639e-08	0.00122151	-1.08054
TFPI2	5.08111e-08	0.00138963	-1.30103
SERPINA5	6.00387e-08	0.001642	-1.23835
TRPV6	6.00387e-08	0.001642	-1.12564
PDZK1	6.12274e-08	0.00167451	-1.14505
C7	6.12274e-08	0.00167451	-1.30466
PTX3	6.12819e-08	0.001676	-1.5441
NTRK2	6.58815e-08	0.00180179	-1.05071
PLTP	7.43728e-08	0.00203402	-1.03641
ATP4A	8.14373e-08	0.00222723	-1.26929
CHST9	1.0087e-07	0.00275868	-1.06099
DLK1	1.11271e-07	0.00304316	-1.01571
ESRRG	1.12554e-07	0.00307825	-1.06428
SGK1	1.20927e-07	0.00330722	-1.06579
SERPINA6	1.26779e-07	0.00346727	-1.02801
RBP1	1.35307e-07	0.00370051	-1.00406
ONECUT1	1.5349e-07	0.00419781	-1.13948
AMBP	1.6986e-07	0.00464549	-1.03877
PRSS2	1.70959e-07	0.00467557	-1.06465
AQP1	2.32814e-07	0.00636722	-1.01471
TTN	3.24405e-07	0.00887214	-1.12517
VEPH1	3.37218e-07	0.00922258	-1.0652
CLU	3.39203e-07	0.00927686	-1.03628
SLC16A12	3.51959e-07	0.00962572	-1.34643
SLC30A8	3.77523e-07	0.0103249	-1.03089
TTR	3.88912e-07	0.0106364	-1.11302
DIRAS3	4.11277e-07	0.011248	-1.0614
GSTA3	4.21072e-07	0.0115159	-1.11448
ADIPOQ	4.71699e-07	0.0129005	-1.18539
FXYD2	4.80263e-07	0.0131347	-1.09807
SPAG4	5.20196e-07	0.0142269	-1.10661
GCAT	5.5333e-07	0.015133	-1.22948
SPX	6.62395e-07	0.0181158	-1.13687
APOH	6.67986e-07	0.0182688	-1.08845
SLC38A5	7.1559e-07	0.0195707	-1.04153
FOSB	8.75788e-07	0.0239519	-1.2802
CHRDL1	1.81054e-06	0.0495166	-1.0172
